# Supplementary material for: Association of Polygenic Variants with Type 2 Diabetes Risk and Their Interaction with Lifestyles in Asians
Source: MDPI journal article supplement (doi:10.3390/nu14153222), 2022-08-06
Supplement: s1 [file s1]

**Table S1.** Characteristics of all genetic variants selected from GWAS for type 2 diabetes at  $P < 5 \times 10^{-6}$ .

| CHR | SNP         | BP        | A1A2 | OR      | SE      | P                      | Gene names | location              | MAF      | HWE     |
|-----|-------------|-----------|------|---------|---------|------------------------|------------|-----------------------|----------|---------|
| 2   | rs72976740  | 161299818 | T C  | 1.311   | 0.05724 | $2.19 \times 10^{-6}$  | RBMS1      | Intron                | 0.03336  | 0.2494  |
| 3   | rs73134196  | 13276044  | G A  | 0.82660 | 0.03248 | $4.52 \times 10^{-9}$  | IQSEC1     | Intron                | 0.1575   | 0.4186  |
| 3   | rs7631705   | 23632234  | C T  | 0.88840 | 0.02424 | $8.00 \times 10^{-9}$  | UBE2E2     | 3_prime_utr           | 0.3341   | 0.5715  |
| 3   | rs113386200 | 63832212  | C T  | 0.88940 | 0.02294 | $3.29 \times 10^{-7}$  | THOC7      | Intron                | 0.4183   | 0.5814  |
| 6   | rs35612982  | 20682622  | C T  | 1.342   | 0.02259 | $9.35 \times 10^{-39}$ | CDKAL1     | Intron                | 0.4649   | 0.1131  |
| 7   | rs2191349   | 15064309  | G T  | 0.89060 | 0.02427 | $2.91 \times 10^{-7}$  | DGKB       | Non-coding transcript | 0.3233   | 0.04656 |
| 7   | rs61160304  | 127249659 | T C  | 1.492   | 0.03797 | $6.34 \times 10^{-26}$ | PAX4       | Non-coding transcript | 0.07384  | 0.2274  |
| 8   | rs72664959  | 69363625  | T C  | 1.207   | 0.03917 | $1.58 \times 10^{-6}$  | C8orf34    | Nmd transcript        | 0.081530 | 0.07773 |
| 8   | rs13266634  | 118184783 | T C  | 0.85290 | 0.02329 | $8.22 \times 10^{-12}$ | SLC30A8    | Missense              | 0.398    | 0.9656  |
| 9   | rs7034200   | 4289050   | A C  | 1.113   | 0.0227  | $2.05 \times 10^{-7}$  | GLIS3      | Nmd transcript        | 0.4064   | 0.3467  |
| 9   | rs10811661  | 22134094  | C T  | 0.79650 | 0.02306 | $6.33 \times 10^{-24}$ | CDKN2A/B   | Non-coding transcript | 0.4387   | 0.1998  |
| 10  | rs12764758  | 94516663  | T C  | 1.285   | 0.04837 | $5.00 \times 10^{-10}$ | IDE        | Non-coding transcript | 0.04856  | 0.3958  |
| 11  | rs60808706  | 2857233   | A G  | 0.78740 | 0.02367 | $6.65 \times 10^{-25}$ | KCNQ1      | Intron                | 0.3913   | 0.2251  |
| 11  | rs757110    | 17418477  | C A  | 1.126   | 0.02277 | $1.84 \times 10^{-7}$  | ABCC8      | Missense              | 0.4012   | 0.6183  |
| 11  | rs36036422  | 120476821 | T C  | 0.75790 | 0.06021 | $4.16 \times 10^{-6}$  | GRIK4      | Intron                | 0.04462  | 0.175   |
| 12  | rs11414025  | 66225188  | GT G | 1.116   | 0.02348 | $2.80 \times 10^{-6}$  | HMGA2      | Nmd transcript        | 0.3409   | 0.8615  |
| 15  | rs11853287  | 77399371  | G A  | 1.113   | 0.02262 | $2.15 \times 10^{-6}$  | PEAK1      | 3_prime_utr           | 0.4248   | 0.8262  |
| 17  | rs11651052  | 36102381  | A G  | 1.157   | 0.02406 | $5.17 \times 10^{-10}$ | HNF1B      | Intron                | 0.3009   | 0.4383  |
| 20  | rs3859609   | 42823424  | T C  | 0.89350 | 0.02312 | $1.11 \times 10^{-6}$  | OSER1      | Non-coding transcript | 0.3988   | 0.4185  |
| 20  | rs6103720   | 43010130  | G A  | 0.87620 | 0.02851 | $3.55 \times 10^{-6}$  | HNF4A      | Intron                | 0.2069   | 0.1219  |
